# Supplementary material for: Chlorosulfonic Acid Stretched Carbon Nanotube Sheet for Flexible and Low-Voltage Heating Applications
Source: Nanomaterials (Basel). 2021 Aug 21;11(8):2132. doi: 10.3390/nano11082132 (PMC8398647; doi:10.3390/nano11082132)
Supplement: Supplementary file 1 [file nanomaterials-11-02132-s001.zip › Supplementary information.pdf]

## ***Supplementary information***

### **Chlorosulfonic Acid Stretched Carbon Nanotube Sheet for Flexible and Low-Voltage Heating Applications**

**Daniel Rui Chen <sup>1,\*</sup>, Megha Chitranshi <sup>2,\*</sup>, Paa Kwasi Adusei <sup>1</sup>,  
Mark Schulz <sup>1</sup>, Vesselin Shanov <sup>1,3</sup>, Marc M. Cahay <sup>2</sup>**

<sup>1</sup> Department of Mechanical and Materials Engineering, University of Cincinnati, Cincinnati, OH 45221, USA

<sup>2</sup> Department of Electrical Engineering and Computer Science, University of Cincinnati, Cincinnati, OH 45212, USA

<sup>3</sup> Department of Chemical and Environmental Engineering, University of Cincinnati, Cincinnati, OH 45221-0012, USA

\* These two authors contribute equally for this manuscript

Corresponding Author: Daniel Rui Chen, E-mail: chenru@mail.uc.edu;

Megha Chitranshi, E-mail: chitrama@mail.uc.edu

Mark Schulz, E-mail: schulzmk@ucmail.uc.edu,

## S1. Raman data

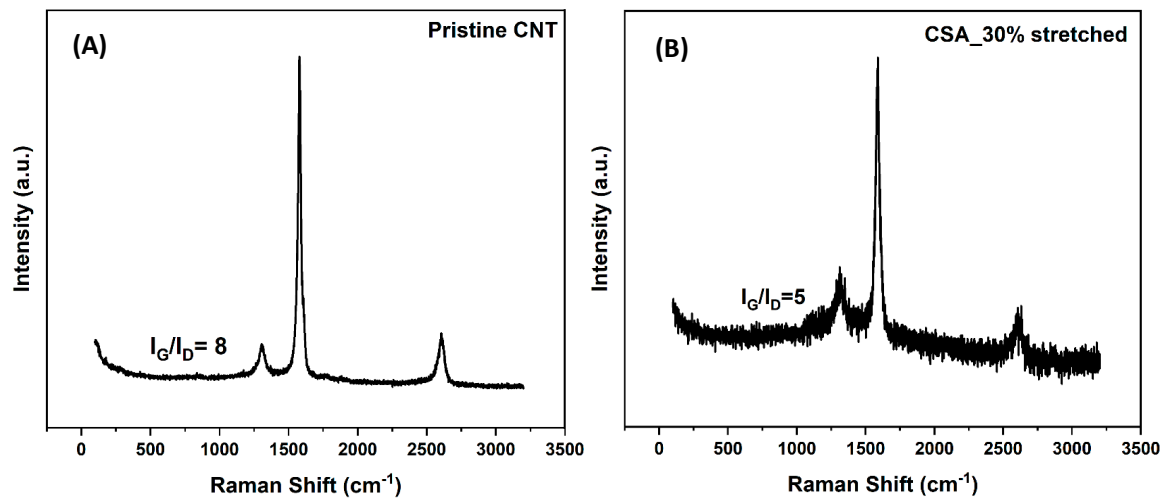

Figure S1. The Raman graph of as-synthesized CNT (A) and as-synthesized CNT after 30% CSA stretched (B).

## S2. Mechanical properties measurement

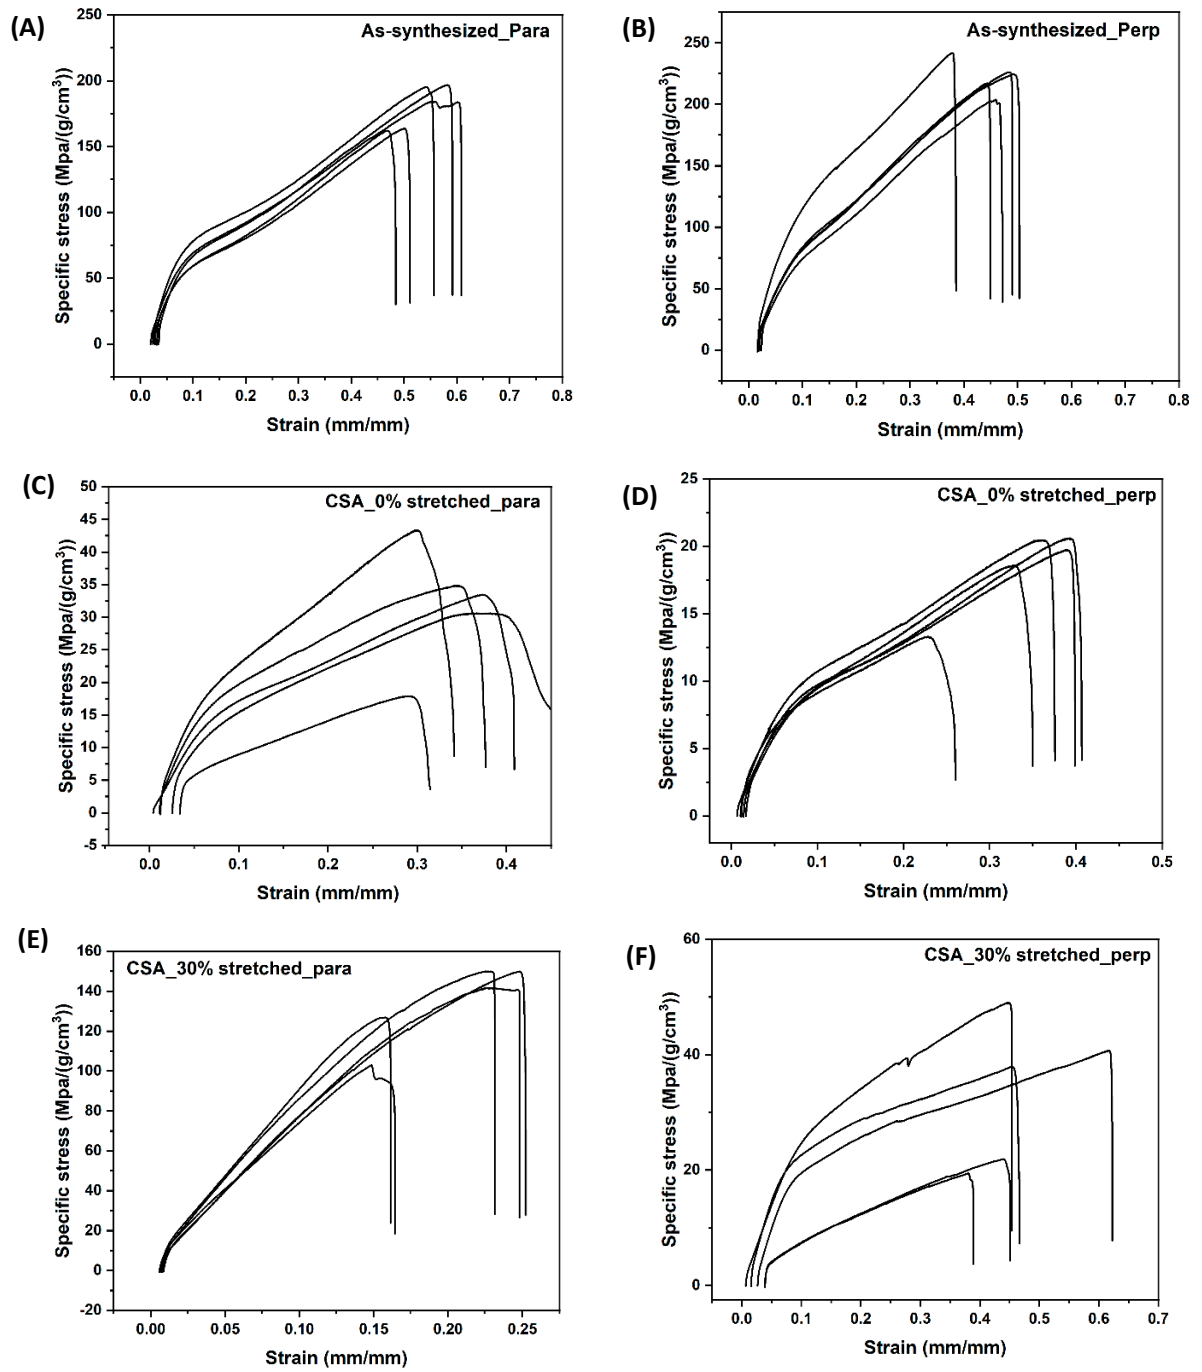

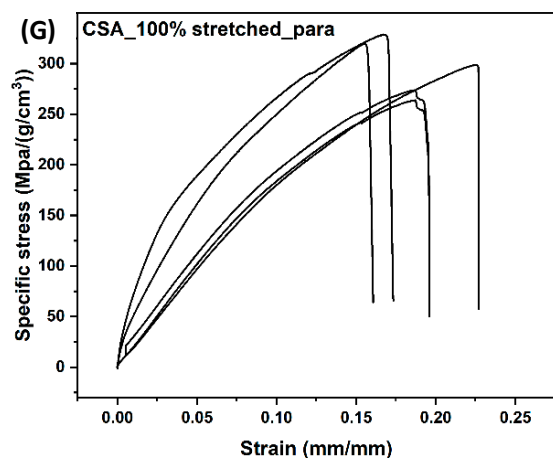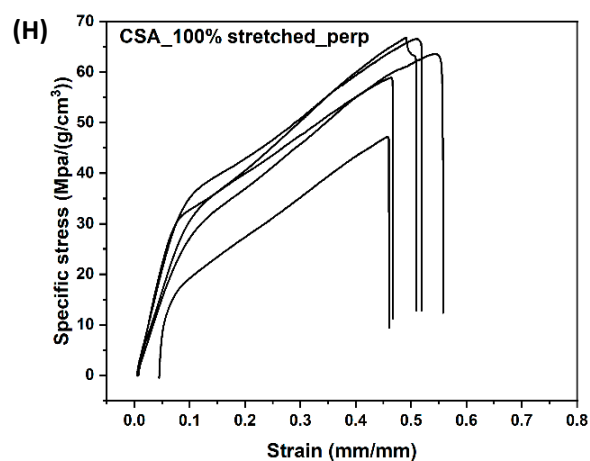

**Figure S2. Tensile test of CNT samples after various treatments, the measurement of as-synthesized (without any treatment) CNT sample from parallel direction (A) and perpendicular direction (B); CNT sample after 0% stretched in the CSA solution from parallel direction (C) and perpendicular direction (D); CNT sample after 30% stretched in CSA solution from parallel direction (E) and perpendicular direction (F); CNT sample after 100% stretched in CSA solution from parallel direction (G) and perpendicular direction (H).**

### S3. Sheet conductance

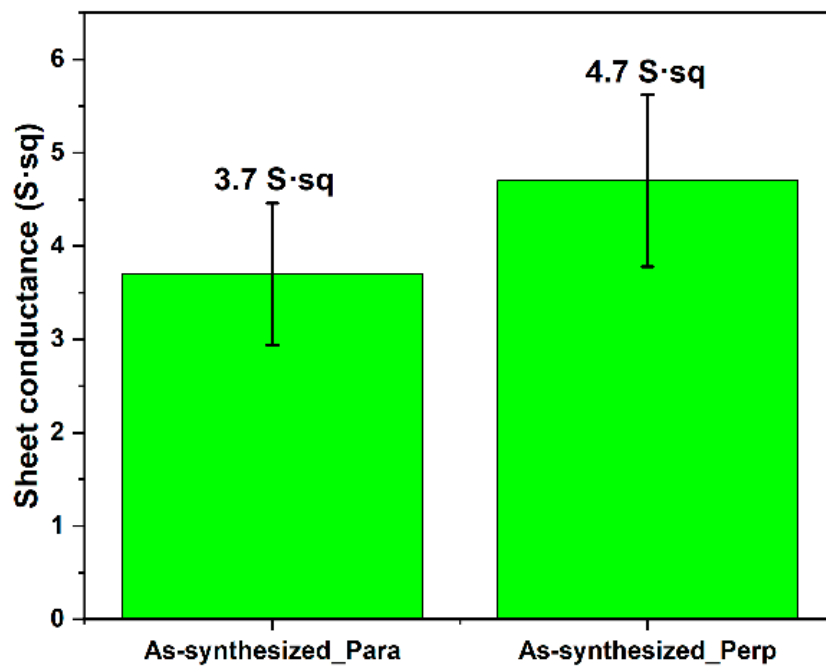

Figure S3. Sheet conductance of as-synthesized CNT sheet in parallel and perpendicular directions.

#### S4. Heating performance graph of various samples

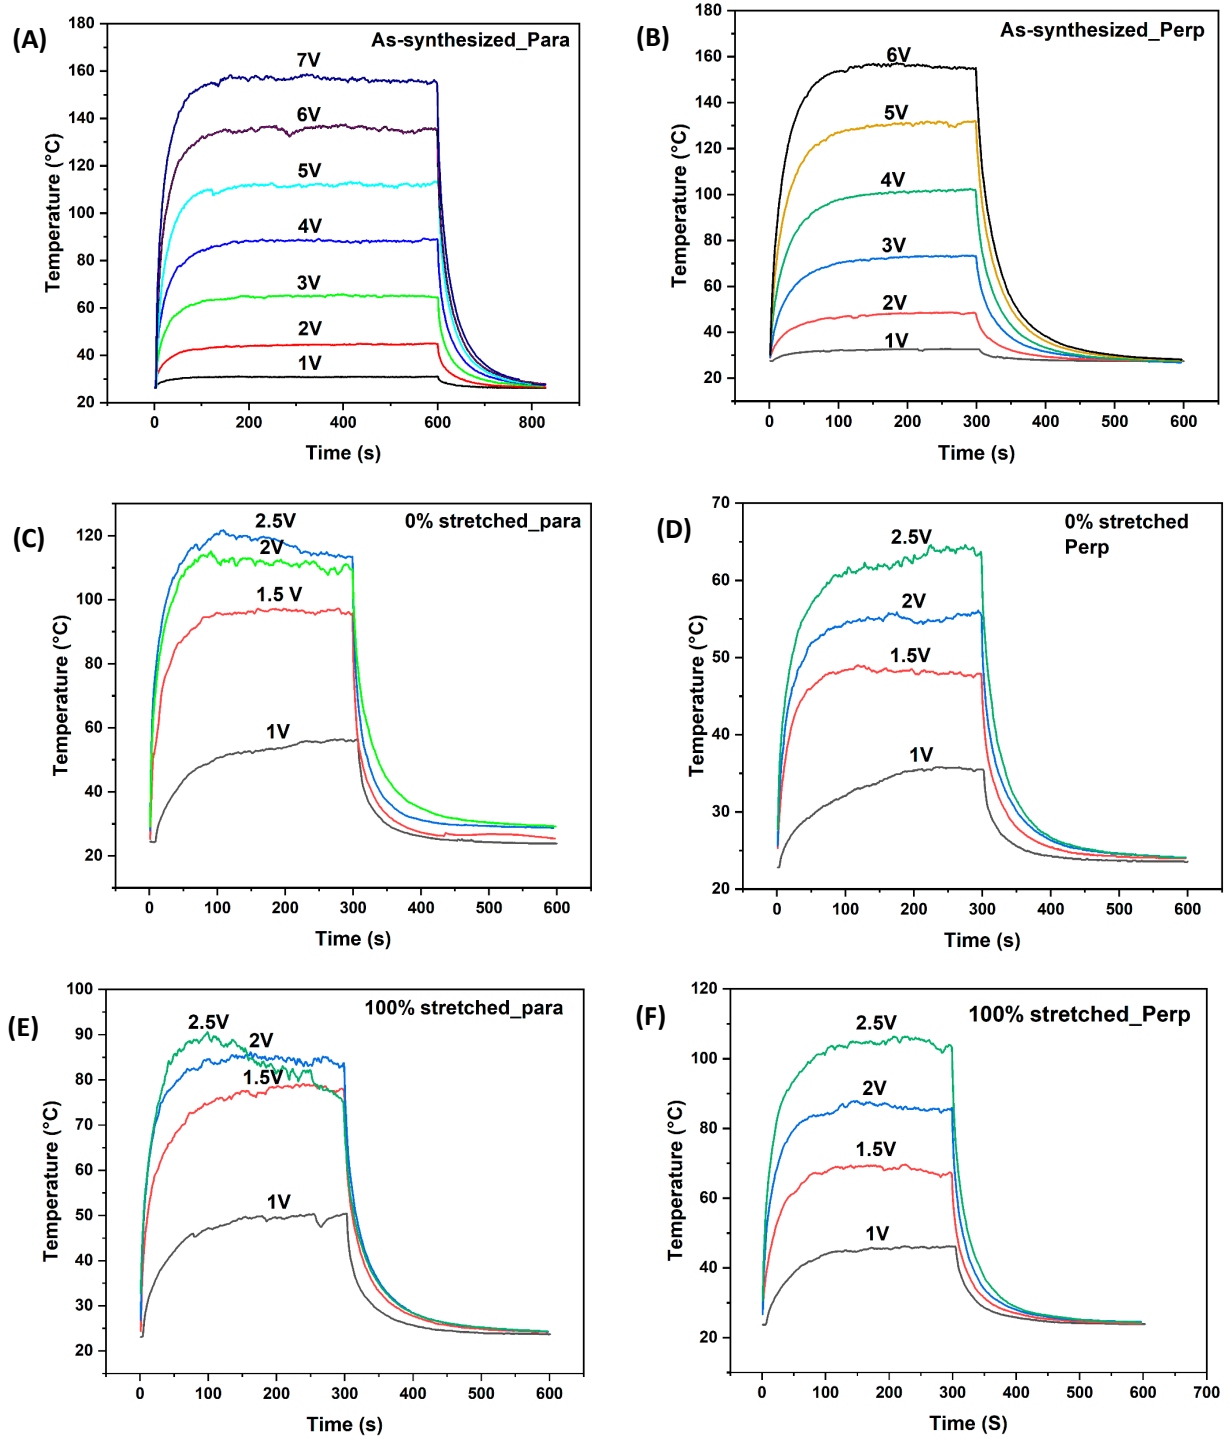

Figure S4. Heating performance under different voltages from samples: as-synthesized CNT in parallel direction (A) and perpendicular direction (B); 0% stretched in parallel direction (C) and perpendicular direction (D); 100% stretched in parallel direction (E) and perpendicular direction (F).

**Table S1. Heating information of various stretched CNT sheets.**

| Sample                       | Current (A) | Voltage (V) | Electrical power input (W) | Maximum temperature (°C) | Time to reach maximum temperature (s) | Time to reach half of the maximum temperature (s) | Time to drop to half of the maximum temperature (s) | Temperature rise in the first 30s (s) |
|------------------------------|-------------|-------------|----------------------------|--------------------------|---------------------------------------|---------------------------------------------------|-----------------------------------------------------|---------------------------------------|
| Pristine parallel            | 0.46        | 2.5         | 0.152                      | 50.3                     | 248                                   | 6                                                 | 118                                                 | 4.3                                   |
| Pristine perpendicular       | 0.182       | 2.5         | 0.46                       | 45.4                     | 247                                   | 0                                                 | 353                                                 | 14.1                                  |
| 0% stretched parallel        | 0.693       | 2.5         | 1.39                       | 121.5                    | 105                                   | 5                                                 | 206                                                 | 78.7                                  |
| 0% stretched perpendicular   | 0.368       | 2.5         | 0.92                       | 64.6                     | 225                                   | 2                                                 | 120                                                 | 27.5                                  |
| 30% stretched parallel       | 0.9         | 2.5         | 2                          | 183.6                    | 83                                    | <3                                                | 225                                                 | 147.5                                 |
| 30% stretched perpendicular  | 0.774       | 2.5         | 1.95                       | 115.1                    | 91                                    | 4                                                 | 234                                                 | 71.6                                  |
| 100% stretched parallel      | 0.51        | 2.5         | 1.28                       | 90.6                     | 99                                    | 4                                                 | 222                                                 | 53.4                                  |
| 100% stretched perpendicular | 0.614       | 2.5         | 1.54                       | 106.2                    | 210                                   | 5                                                 | 114                                                 | 60.3                                  |
